# Supplementary material for: Mineralization of calcite ribbons on an Allium fistulosum L. bulb inner membrane in an ethanol–water mixed solvent under control of polyacrylic acid by a double diffusion method
Source: Royal Society of Chemistry journal article supplement (doi:10.1039/c002697b), 2010-01-01
Supplement: c002697b.pdf [file c002697b.pdf]

## Supplementary Information

### **Mineralization of Calcite Ribbons on an *Allium fistulosum* L. Bulb Inner Membrane in an Ethanol/Water Mixed Solvent under Control of Polyacrylic Acid by a Double Diffusion Method**

Lei Liu, Bo Hu, Shao-Feng Chen, Shu-Juan Liu, Jun Jiang, Guo-Bin Cai,  
Shu-Hong Yu\*

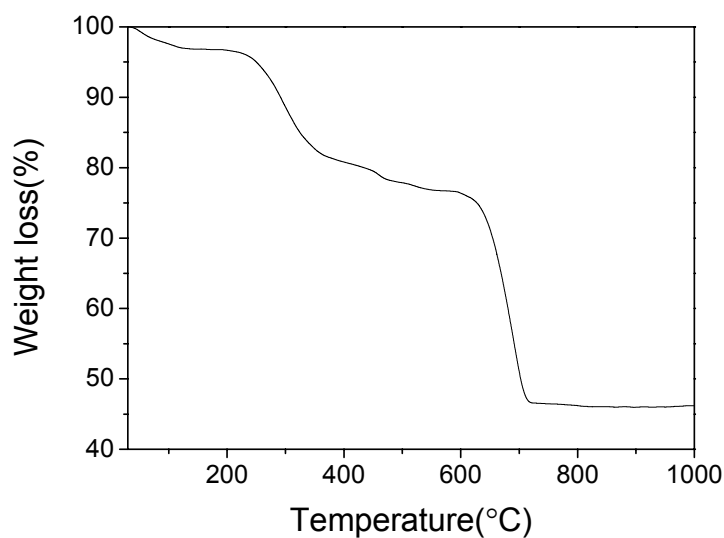

**Fig. S1** TGA curve of the bulb membrane after  $\text{CaCO}_3$  mineralization for 7 days. The volume ratio of DIW/ethanol is  $R = 1.5:1$ .  $[\text{CaCl}_2] = 0.1 \text{ M}$ ,  $[\text{Na}_2\text{CO}_3] = 0.1 \text{ M}$ .

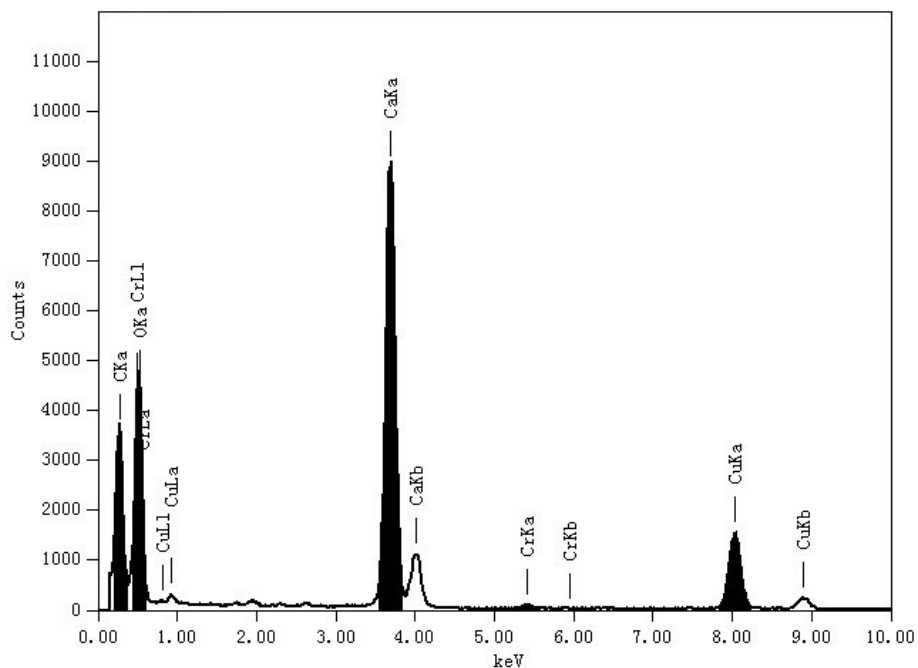

**Fig. S2** EDS spectrum of the as-prepared  $\text{CaCO}_3$  minerals formed on the inner surface of the bulb membrane. The volume ratio of DIW/ethanol is  $R = 1.5:1$ .  $[\text{CaCl}_2] = 0.1$  M,  $[\text{Na}_2\text{CO}_3] = 0.1$  M.

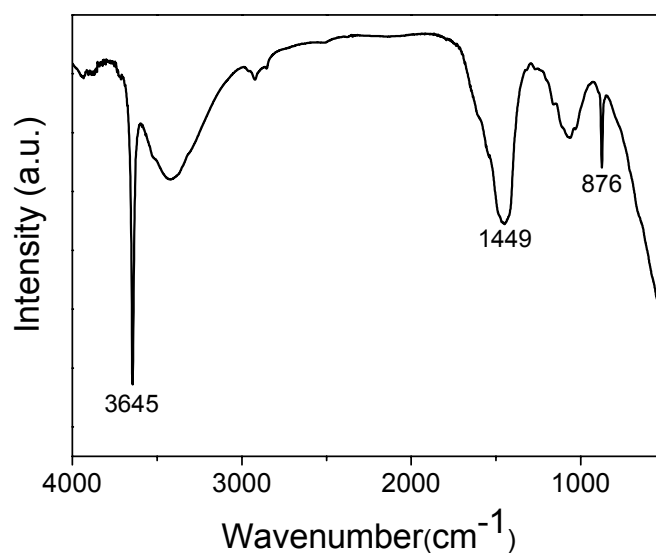

**Fig. S3** FT-IR spectrum of the blossom-like crystals formed on the inner surface of the bulb membrane. The volume ratio of DIW/ethanol is  $R = 1.5:1$ .  $[\text{CaCl}_2] = 0.1$  M,  $[\text{Na}_2\text{CO}_3] = 0.1$  M. The crystallization time is 7 days.

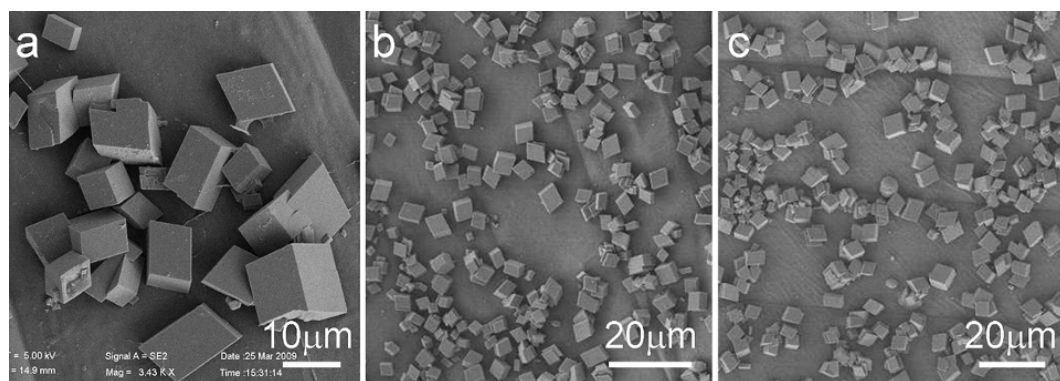

**Fig. S4** SEM images of  $\text{CaCO}_3$  minerals deposited on the outer surface of the bulb membrane with different concentration of PAA in  $\text{CaCl}_2$  solutions: (a) 0, (b)  $2 \times 10^{-3} \text{ g} \cdot \text{L}^{-1}$ , (c)  $5 \times 10^{-3} \text{ g} \cdot \text{L}^{-1}$ . The volume ratio of DIW/ethanol is  $R=1.5:1$ .  $[\text{CaCl}_2] = 0.1 \text{ M}$ ,  $[\text{Na}_2\text{CO}_3] = 0.1 \text{ M}$ .
